# Supplementary material for: Risk Factors for Mortality of Adult Patients With COVID-19: A Two-Year Cohort Study in a Private Tertiary Care Center in Mexico
Source: Preprints.org preprint supplement (doi:10.20944/preprints202301.0433.v1), 2023-01-24
Supplement: Supplementary file 3 [file supplementary]

| **Supplementary table 1. Causes of death** | | | |
| --- | --- | --- | --- |
| *Cause* | *n* | *%* |
| Multi-organic failure | 70 | 42.4 |
| ARDS | 56 | 33.9 |
| Septic shock | 18 | 10.9 |
| Unstable bradycardia | 6 | 3.6 |
| Myocardial infarction | 4 | 2.4 |
| Pulmonary embolism | 5 | 3 |
| Hypovolemic shock | 4 | 2.4 |
| Unstable supraventricular tachycardia | 1 | 0.6 |
| Stroke | 1 | 0.6 |
